# Supplementary material for: An extremely stable open-framework metal–organic polymer with expandable structure and selective adsorption capabilityElectronic supplementary information (ESI) available: Figs. S1 and S2: views of propanol inclusion structure. See http://www.rsc.org/suppdata/cc/b2/b200213b/
Source: Royal Society of Chemistry journal article supplement (doi:10.1039/b200213b), 2002-05-21
Supplement: b200213b.doc [file b200213b.doc]

**Fig. S1** (propanol inclusion structure) View of a section of the framework showing the INA bridge between Cu atoms, and the hydrogen bonding arrangement indicated by dashed lines. All orientations of the disordered propanol are shown, at separate locations.

**Fig. S2** (propanol inclusion structure) Space-filling view of the stacking of the propanol solvent molecules, with only one orientation shown at each site.

Supplementary Material (ESI) for Chemical Communications

This journal is © The Royal Society of Chemistry 2002
